# Supplementary material for: Internet-Based Survey on Physical Activity and Incidence of Injury in Active Working Dogs
Source: MDPI journal article supplement (doi:10.3390/ani13101647), 2023-05-16
Supplement: s1 [file s1]

# **SURVEY ON WORKING DOGS**

(TRASLATION FROM ITALIAN FORM)

## **SECTION 1**

- CANINE BREED \_\_\_\_\_
- CANINE SEX STATUS:
  - Neutered/Spayed
  - Intact/Breeding
- AGE
- DEWORMING FREQUENCY
  - only as a puppy
  - sporadically
  - once a month
  - once a year
- VACCINE SCHEDULE
  - only as a puppy
  - sporadically
  - once a year
- HEARTWORM PREVENTION
  - never
  - sporadically
  - once a month
  - once a year
- TREATMENT FOR HEARTWORM PREVENTION
  - tablets
  - vaccination
  - spot on
  - other
- LEISHMANIASIS PREVENTION
  - never
  - sporadically
  - once a month
  - once a year
- TREATMENT FOR LEISHMANIASIS PREVENTION
  - collar
  - vaccination
  - spot on
- CONTROL OF EXTERNAL PARASITES
  - never
  - sporadically
  - once a month
  - once a year
- TREATMENT FOR EXTERNAL PARASITES PREVENTION
  - collar

- tablets
  - spot on
  - other
- HAS YOUR DOG UNDERGONE AN EARLY X-RAY EXAMINATION?
  - Yes
  - No
- IF YES, SPECIFY AT WHAT AGE(MONTHS/YEARS)
- IF YES, SPECIFY WHICH ANATOMICAL REGIONS WERE EXAMINED
- HAS YOUR DOG UNDERGONE A CONFIRMATORY X-RAY EXAMINATION?
  - Yes
  - No
- IF YES, SPECIFY AT WHAT AGE (MONTHS/YEARS)
- IF YES, SPECIFY WHICH ANATOMICAL REGION/S WAS/WERE EXAMINED
- HAS YOUR DOG UNDERGONE AN ORTHOPEDIC CHECK?
  - Yes
  - No
- IF YES, SPECIFY AT WHAT AGE (MONTHS/YEARS)
- IF YES, SPECIFY WHY
- HAS YOUR DOG UNDERGONE A SPORTS MEDICAL EXAMINATION?
  - Yes
  - No
- IF YES, SPECIFY AT WHAT AGE (MONTHS/YEARS)
- IF YES, SPECIFY WHY
- HAD YOUR DOG UNDERGONE GENERAL BLOOD TESTS?
  - Yes
  - No
- never
  - only as a puppy
  - sporadically
  - once a year
- IF YES, SPECIFY WHY
- IF YES, SPECIFY WHICH TEST
- HAS YOUR DOG UNDERGONE A CARDIOLOGICAL EXAMINATION?
  - never
  - only as a puppy
  - sporadically
  - once a month
  - once a year
- IF YES, SPECIFY WHY
- DO YOU KNOW CANINE PHYSIOLOGICAL PARAMETERS? (RESPIRATORY RATE, HEART RATE, TEMPERATURE)
  - Yes
  - No
- IF YES, PLEASE REPORT THE PHYSIOLOGICAL VALUES

## **SECTION 2**

- DESCRIBE YOUR DOG'S DIET
  - BARF
  - cooked meat
  - dry food
  - canned food
  - other
- HOW OFTEN DO YOU FEED YOUR DOG?
- DO YOU OFFER FOOD BEFORE TRAINING? (SPECIFY HOW LONG BEFORE WORK THE DOG REMAINS FASTING)
- DO YOU MAKE ANY DIETARY CHANGES THROUGHOUT THE YEAR?
  - Yes
  - No
- IF YES, SPECIFY WHY

## **SECTION 3**

- ARE DIETARY SUPPLEMENTS PROVIDED?
  - Yes
  - No
- IF YES, SPECIFY WHICH ONES AND THE FREQUENCY OF ADMINISTRATION
- ARE CHONDROPROTECTORS PROVIDED?
  - Yes
  - No
- IF YES, SPECIFY WHICH ONES AND THE FREQUENCY OF ADMINISTRATION
- ARE ANY DRUGS GENERALLY PROVIDED?
  - Yes
  - No
- IF YES, SPECIFY WHICH ONES AND RATE OF ADMINISTRATION

## **SECTION 4**

- WHERE DOES THE DOG USUALLY LIVE?
  - Owner's home
  - Owner's home and garden
  - Owner's home garden
  - Other place than the owner's home
- IF THE DOG LIVES IN THE GARDEN, SPECIFY WHETHER HE/SHE IS...
  - Free
  - In a dog fence
- WHAT IS THE TYPE OF SURFACE (GROUND, GRAVEL, GRASS...) ON WHICH YOUR DOG MAINLY LIVES?
- WHERE DOES THE DOG SLEEP ON?
  - Kennel
  - Dog bed
  - Ground
  - Other

## **SECTION 5**

- HOW THE DOG IS TRANSPORTED (CAR, VAN, TRAILER, OTHER ...)?
- DURING TRANSPORT THE DOG IS ...
  - Unrestrained
  - In cage
  - Other
- IS THE ENVIRONMENT WHERE THE DOG IS LOCATED DURING TRANSPORT AIR-CONDITIONED?
- SPECIFY THE MINIMUM AND MAXIMUM TRANSPORTING TIME
- IS YOUR DOG TRANSPORTED IN OTHER VEHICLES FOR WORKING? (HELICOPTER, CABLE CAR, BOAT)
  - Yes
  - No
- IF YES, SPECIFY WHICH ONE

## **SECTION 6**

- HOW DO YOU USUALLY RESTRAIN YOUR DOG?
  - Collar
  - Harness
  - Other
- SPECIFY THE TYPE OF COLLAR OR HARNESS
- DURING TRAINING THE DOG IS LED:
  - On a leash
  - Unrestrained
  - Other
- SPECIFY THE LEASH LENGTH
- WHEN WORKING, THE DOG WEARS OTHER TYPES OF HARNESS?
- IF YES, SPECIFY WHICH ONE (FOR EXAMPLE, AIR AMBULANCE)
- IF YOUR DOG WEARS SPECIFIC HARNESS (FOR EXAMPLE HELICOPTER HARNESS) DURING WORK THE HARNESS IS REMOVED OR NOT?
- WHEN THE DOG STARTS WORKING AFTER REMOVING THE HARNESS, DO YOU NOTICE THE DIFFERENCE IN MOVEMENTS/GAIT?

## **SECTION 7**

- WHAT IS YOUR DOG'S WORK?
- IS YOUR DOG'S WORK ...?
  - A part-time work (hobby)
  - A full-time work
- AT WHAT AGE DID THE DOG START WORKING?
- HOW MANY DAYS A WEEK DOES THE DOG WORK?
- IS YOUR DOG ... ?
  - In training
  - In activity
  - Initial level
- WHAT IS THE SURFACE (GROUND, RUBBLE, WATER...) WHERE YOUR DOG MAINLY WORKS?

## **SECTION 8**

- WHAT DO YOU MEAN FOR “TRAINING/CONDITIONING”?
- WHAT IS YOUR DOG’S TYPE OF TRAINING?
- HOW MANY DAYS A WEEK IS YOUR DOG TRAINED?
- IS THE TRAINING SPECIFIC FOR THE WORK PERFORMED BY THE DOG?

## **SECTION 9**

- DO YOU APPLY ANY PREVENTION OF INJURIES FOR YOUR DOG IN WORKING/TRAINING CONDITIONS?
  - No prevention
  - Prevention
- DESCRIBE THE INJURY PREVENTION PROTOCOL (MASSAGE, ETC)
- BEFORE WORKING, DOES THE DOG WARM UP? IF YES, FOR HOW LONG AND WHAT KIND OF EXERCISES ARE PERFORMED (DESCRIBE)
- AFTER WORKING, DOES THE DOG COOL DOWN? IF YES, FOR HOW LONG AND WHAT KIND OF EXERCISES ARE PERFORMED (DESCRIBE)
- WHO HAS DRAFTED THE PREVENTION PROTOCOL?
  - The veterinarian
  - Physiatrist vet
  - Coach
  - By myself
  - Other
- DESCRIBE HOW YOU PREVENT INJURIES ON THE LIMBS (FRONT AND REAR)
- DESCRIBE HOW YOU PREVENT INJURIES ON THE SPINE
- HOW MUCH TIME DO YOU DEDICATE TO PREVENTION (SPECIFY MINUTES AND FREQUENCY)?
- DESCRIBE HOW YOU PREVENT INJURIES AFTER WORK
  - No prevention
  - Massage
  - Warm compresses
  - Other

## **SECTION 10**

- IN YOUR OPINION, WHAT ARE THE PAIN SIGNALS THAT LET YOU UNDERSTAND THE PRESENCE OF AN INJURY?
- HAS YOUR DOG EVER BEEN INJURED?
  - Yes
  - No
- IF YES, DESCRIBE THE INJURY
- HOW MANY INJURIES (TRAUMA TO THE MUSCULOSKELETAL SYSTEM) HAS YOUR DOG SUFFERED?
- DID THE EFFECTS OF THE TRAUMA SHOW UP IMMEDIATELY DURING/AFTER WORK OR IN THE FOLLOWING DAYS?
- DID YOUR DOG'S INJURY PRODUCE SHORT-TERM OR LONG-TERM SIGNS?
- SPECIFY HOW LONG THE DOG HAS BEEN AT REST
- HAS THE TRAUMA ALWAYS AFFECTED THE SAME LIMB? IF SO, WHICH ONE ?
- HAS THE INJURY RECURRED?
- WHO DIAGNOSED THE INJURY?

- ☐ A veterinarian
  - ☐ Coach
  - ☐ Owner him/herself
  - ☐ Other
- WHO PROVIDED INJURY THERAPY?
  - ☐ A veterinarian
  - ☐ Coach
  - ☐ Owner him/herself
  - ☐ Other
- HAVE YOUR DOG EVER NEEDED REHABILITATION TREATMENT AFTER AN INJURY?
  - ☐ Yes
  - ☐ No
- IF YES, SPECIFY WHICH REHABILITATION TREATMENT
- HAVE YOUR DOG EVER NEEDED SURGERY AFTER AN INJURY?
  - ☐ Yes
  - ☐ No
- IF YES, SPECIFY WHICH SURGERY
- IF YOUR DOG HAS SUFFERED MULTIPLE INJURIES, SPECIFY WHERE, HOW AND IF INJURIES RESOLVED DEFINITELY

#### **SECTION 11**

- DID YOU ATTEND COURSES ON THE WELL-BEING OF YOUR DOG?
  - ☐ Yes
  - ☐ No
- IF YES, SPECIFY WHICH COURSE
- WOULD YOU AGREE TO MAKE CANINE SPORTS VISIT ANNUALLY MANDATORY?
  - ☐ Yes
  - ☐ No
- WHY?
- DO YOU HAVE ANY SUGGESTIONS OR WOULD YOU LIKE TO EXPRESS YOUR OPINION ON THE WELFARE OF WORKING DOGS?

#### **SECTION 12**

I AUTHORIZE THE USE OF THE AGGREGATED DATA IN AN ANONYMOUS FORM FOR EPIDEMIOLOGICAL STUDIES AND FOR ANY SCIENTIFIC DISCLOSURES AT SCIENTIFIC MEETINGS AND/OR JOURNALS

- ☐ Yes
- ☐ No

#### **SECTION 13**

PERSONAL COMMENTS OR SUGGESTIONS ON WORKING DOGS' WELFARE
